# Supplementary material
Source: Research Square preprint supplement (doi:10.21203/rs.3.rs-9681475/v1)
Supplement: Supplementary file 1 [file a52b0d77bf4e166f6705c35e.docx]

Supplementary Materials


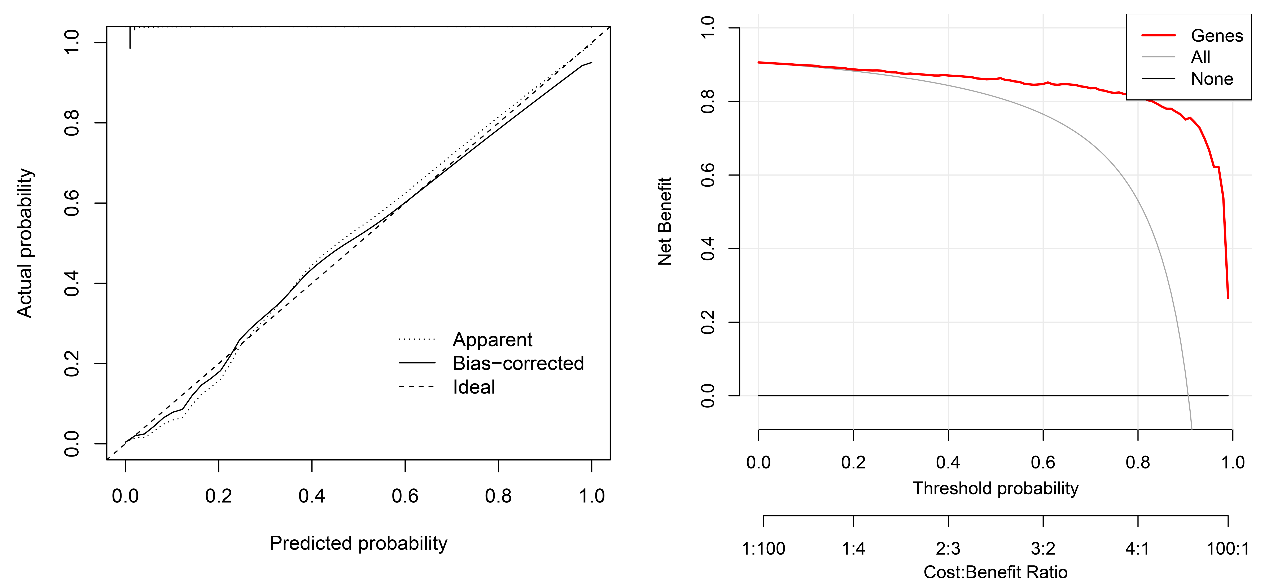


**Supplementary Figure 1. Calibration and Clinical Utility Assessment of Nomogram.** (A) Calibration curves of the multi-gene diagnostic model (dotted line=apparent calibration curve, solid line=bias-corrected curve, dashed line=ideal reference line); (B) Decision curve analysis of the multi-gene diagnostic model (red line=model net benefit, gray line=all intervention strategy, black line=no intervention strategy).
